# Supplementary material
Source: publisher site journal article supplement (https://www.dovepress.com/article/306035)
Supplement: Supplementary file 1 [file get_supplementary_file.php]

**Supplementary Table S-1**

*Identification of proteins in sputum*

**Gradient** : The peptides were eluted from the column at a flow rate of 300 nl per minute using a linear gradient of 2-35% mobile phase B in 57 minutes (Mobile phase A was 99.9% water + 0.1% formic acid and mobile phase B was 100% Acetonitrile with 0.1% formic acid). The mass parameters were given in the following table:

| **Parameters** | **DDA run** |
| --- | --- |
| Ion spray voltage | 2.4 KV |
| Curtain gas | 25 |
| Nebulizer gas | 25 |
| Source temperature | 1300C |
| MS mass range | 400-1600 m/z |
| MS/MS mass range | 100-1800 m/z |
| Charge state | +2 to +5 |
| Accumulation time | 0.25s for MS and 0.070s for MS/MS |
| Cycle time | 2.05s |

**Supplementary Table S-2**

*Generation of spectral ion library and SWATH-MS based quantification:*

**Gradient:** Peptides were separated on a reverse phase C18 analytical column (Chrom XP C18, 3µm 120 Å, Eksigent) using buffer A (97.9 % water with 2 % acetonitrile and0.1 % formic acid) and buffer B (97.9 % acetonitrile with 0.1 % formic acid and 2 % water) and following gradient: buffer B was increased gradually from initial 3% to 25% in 68 minutes, further increased to 35% solvent B in next 5 minutes, in the next 2 minutes buffer B was ramped up to 80% and held at the same concentration for next 3 minutes. Buffer B was brought to initial 3% concentration in next 1 minute and column was reconditioned for 8 minutes before next run. The mass parameters were given in the following table:

| **Parameters** | **DDA run (Spectral library)** | **DIA run (SWATH)** |
| --- | --- | --- |
| Ion spray voltage | 5.5KV | 5.5KV |
| Curtain gas | 30 | 20 |
| Nebulizer gas | 35 | 15 |
| Source temperature | 2000C | 2000C |
| MS mass range | 400-1250 m/z | 400-1250 m/z |
| MS/MS mass range | 100-1500 m/z | 100-1500 m/z |
| Charge state | +2 to +5 | +2 to +5 |
| Accumulation time | 0.25s for MS and 0.050s for MS/MS | 0.25s for MS and 0.025s for MS/MS |
| Cycle time | 1.8s | 2.84s |

**Supplementary Table S 3**:

Details of parameters of individual patients used for inflammatory phenotyping.

Pt – patient; IgE- immunoglobulin E; AEC- Absolute blood eosinophil counts; N- neutrophilic; E- eosinophilic; P- paucigranulocytic; X- Test result not available.

Note: Sputum also has other cells (lymphocytes, other mononuclear cells) which is not relevant here and has not been mentioned)

| **Pt No** | **Pt ID** | **Clinical phenotype** | **Serum Ig E**  **IU/L** | **AEC cells/cu mm** | **Sputum Total cell count cells/g** | **Sputum Neutrophil %** | **Sputum Eosinophil%** | **Inflammatory phenotype** | **Proteotype** |
| --- | --- | --- | --- | --- | --- | --- | --- | --- | --- |
| 1 | RD | CB | 62.7 | 82 | 6.94 | 75 | 0 | N | 2 |
| 2 | SR | CB | 56.73 | 200 | x | x | x | x | 2 |
| 3 | SKC | CB | 68.7 | 368 | 9.7 | 70 | 3 | E | 2 |
| 4 | SD | Asthma | 435 | 374.4 | 6.944 | 80 | 0 | N | 4 |
| 5 | TP | Asthma | x | 97 | 1.492 | 60 | 1 | P | 2 |
| 6 | KP | Asthma | 1230 | 319 | x | x | x | E | 4 |
| 7 | RBD | Asthma | 439 | 810 | 8.129 | 60 | 3 | E | 3 |
| 8 | BD | Asthma | 250 | 648 | 6.451 | 90 | 2 | Mixed | 3 |
| 9 | UD | COPD | 57.5 | 338.4 | 7.65 | 60 | 10 | E | 1 |
| 10 | PN | COPD | 290 | 316 | 2.393 | 70 | 3 | E | 1 |
| 11 | BC | COPD | 2504 | 528 | x | 60 | 3 | E | 4 |
| 12 | NKC | COPD | 283 | 61 | x | x | x | x | 1 |
| 13 | VA | Control | x | 74 | x | x | x | x | 4 |
| 14 | CS | Control | 56.36 | 136 | 1.6 | 55 | 0 | P | 4 |
| 15 | KC | Control | 12.92 | 134 | 1.9 | 45 | 0 | P | 2 |
